# Supplementary material
Source: publisher site journal article supplement (https://www.dovepress.com/article/606554)
Supplement: Supplementary file 1 [file 606554%20Revised%20Supplementary%20Materials.docx]

**
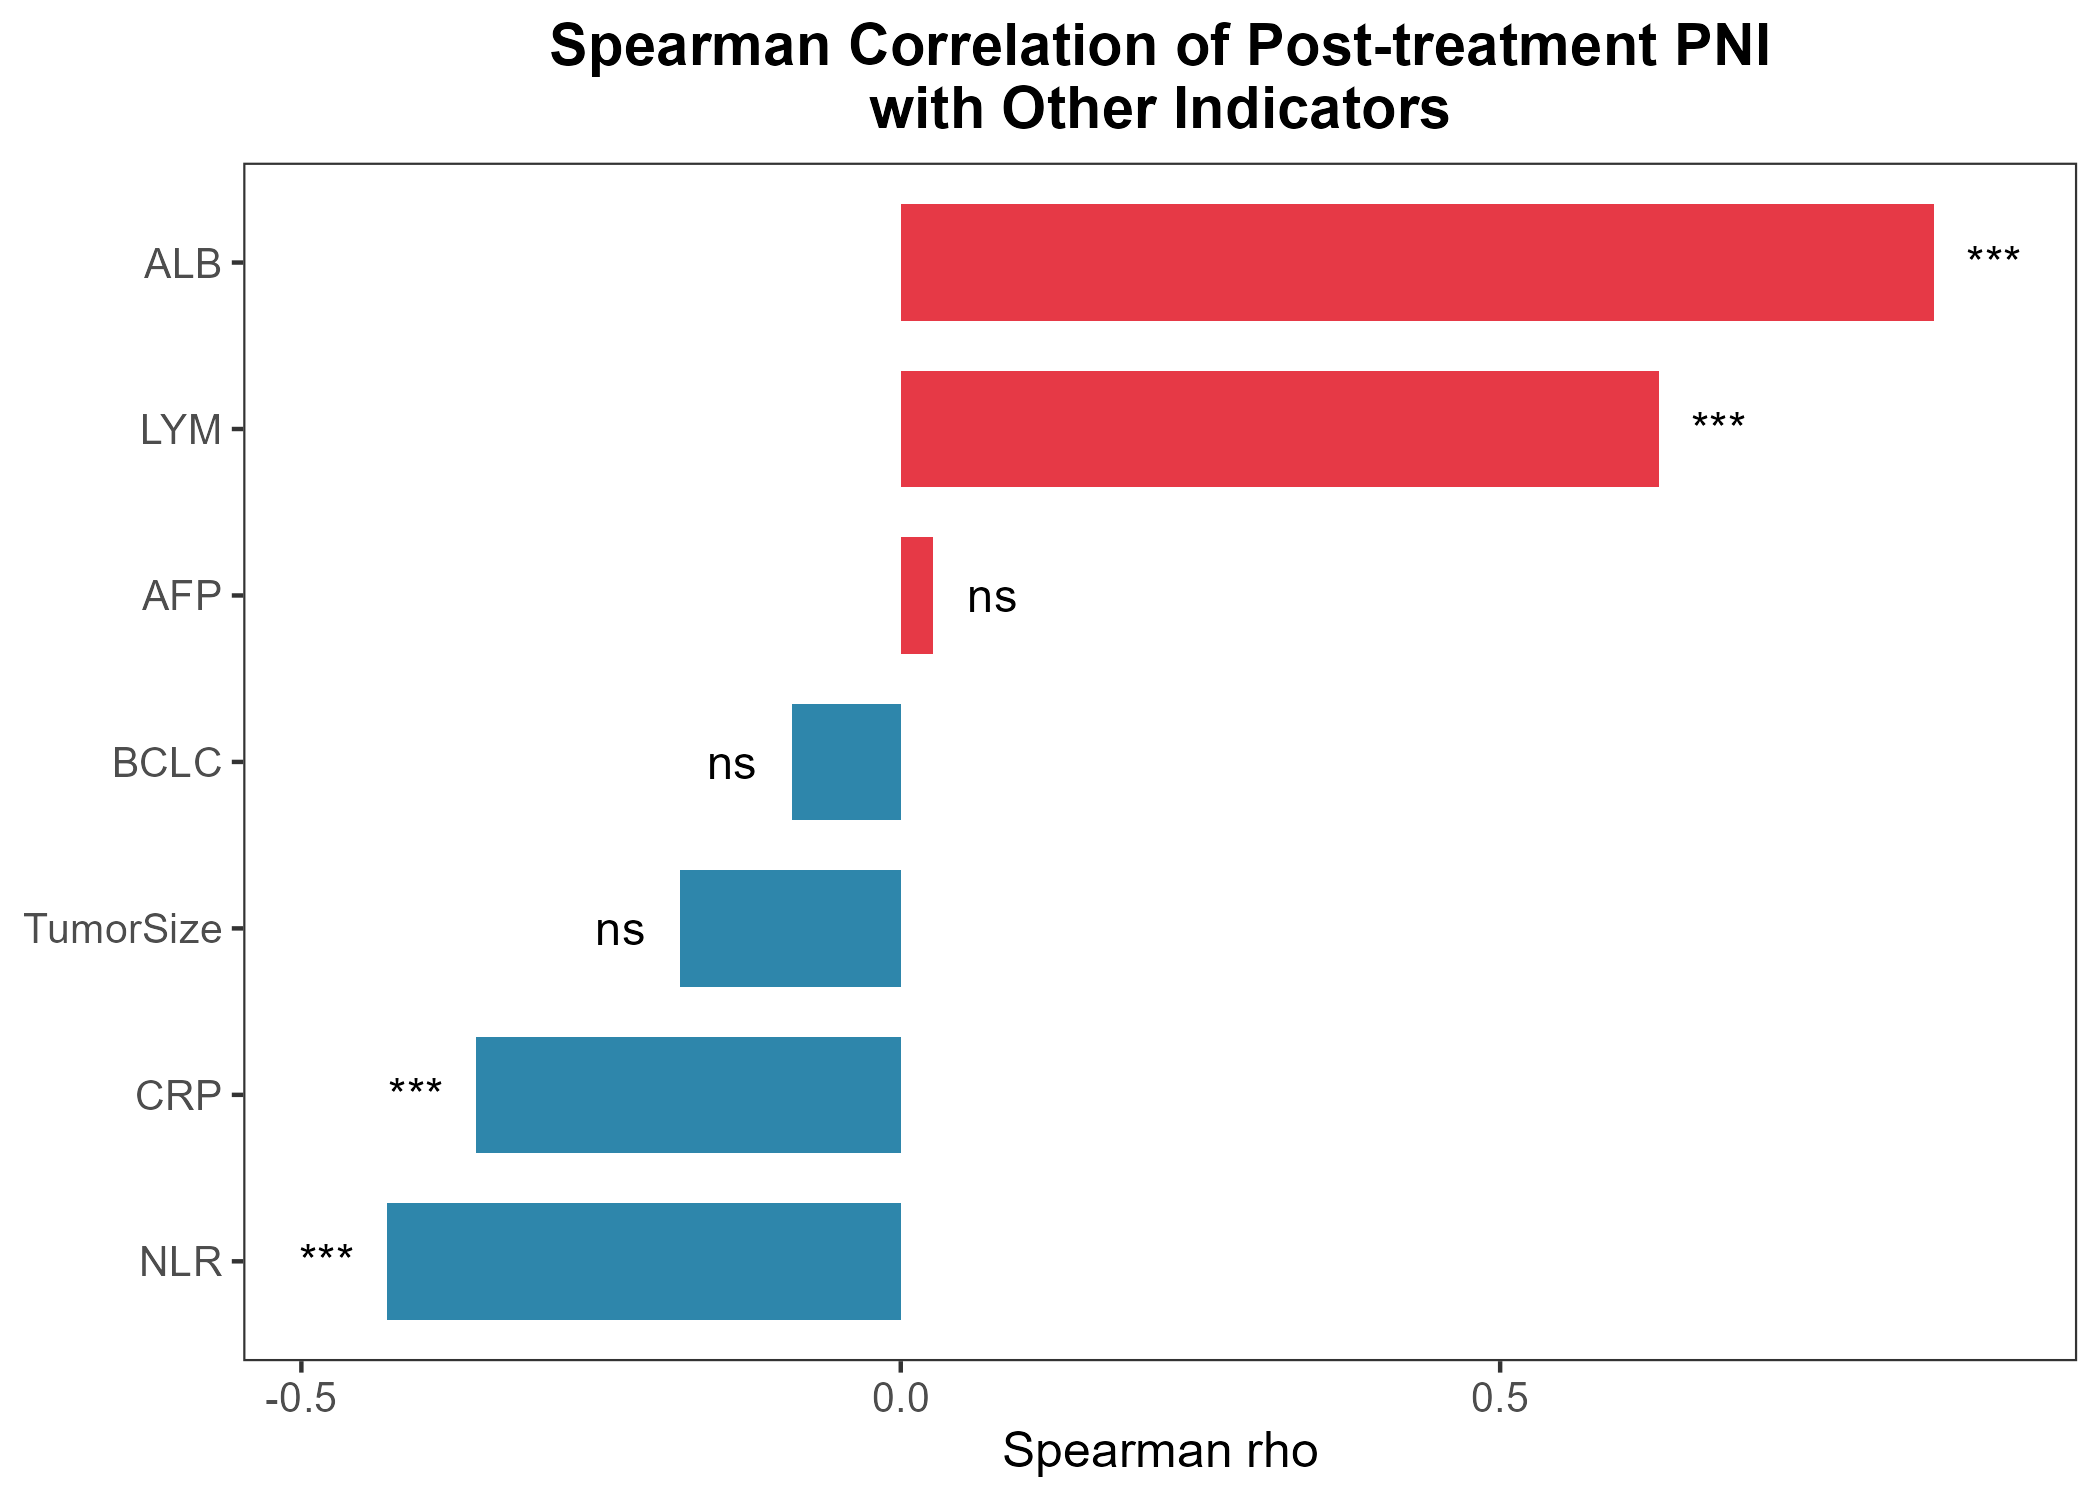
**

**Supplementary Figure S1.** Spearman correlation coefficients between post-treatment PNI and clinical indicators. Red bars indicate positive correlations, blue bars indicate negative correlations. ***P < 0.001; ns, not significant.


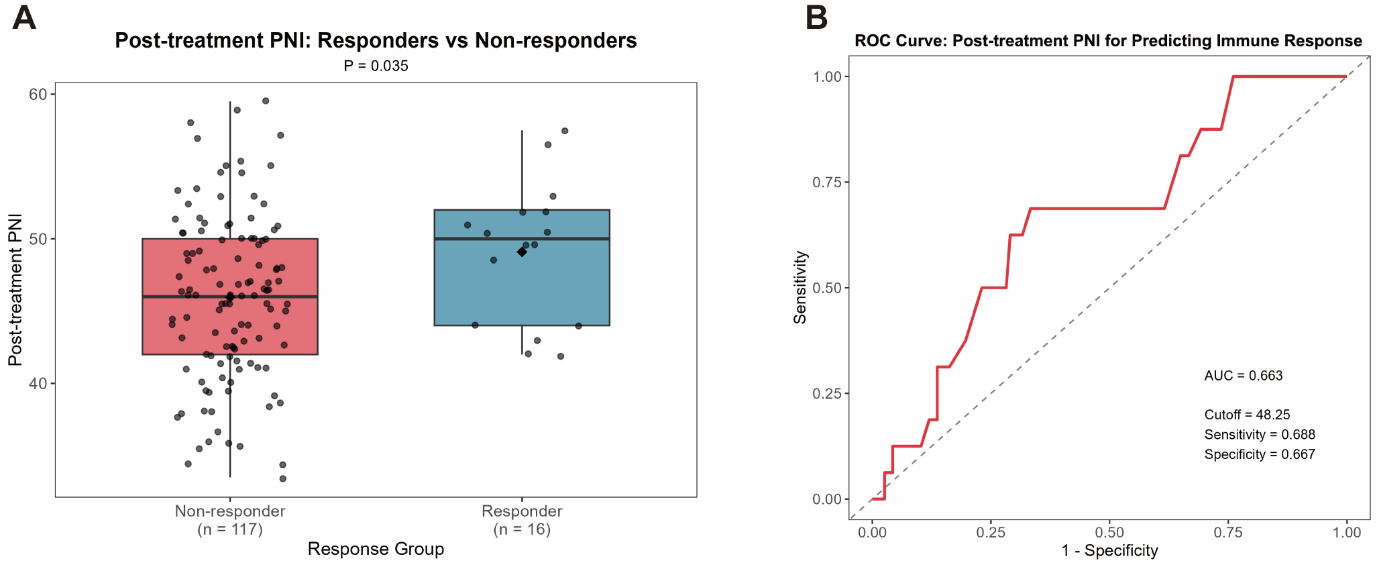


**Supplementary Figure S2.** Post-treatment PNI levels and objective response. (A) Comparison between responders and non-responders. (B) ROC curve for predicting objective response (AUC = 0.663, optimal cutoff = 48.25).


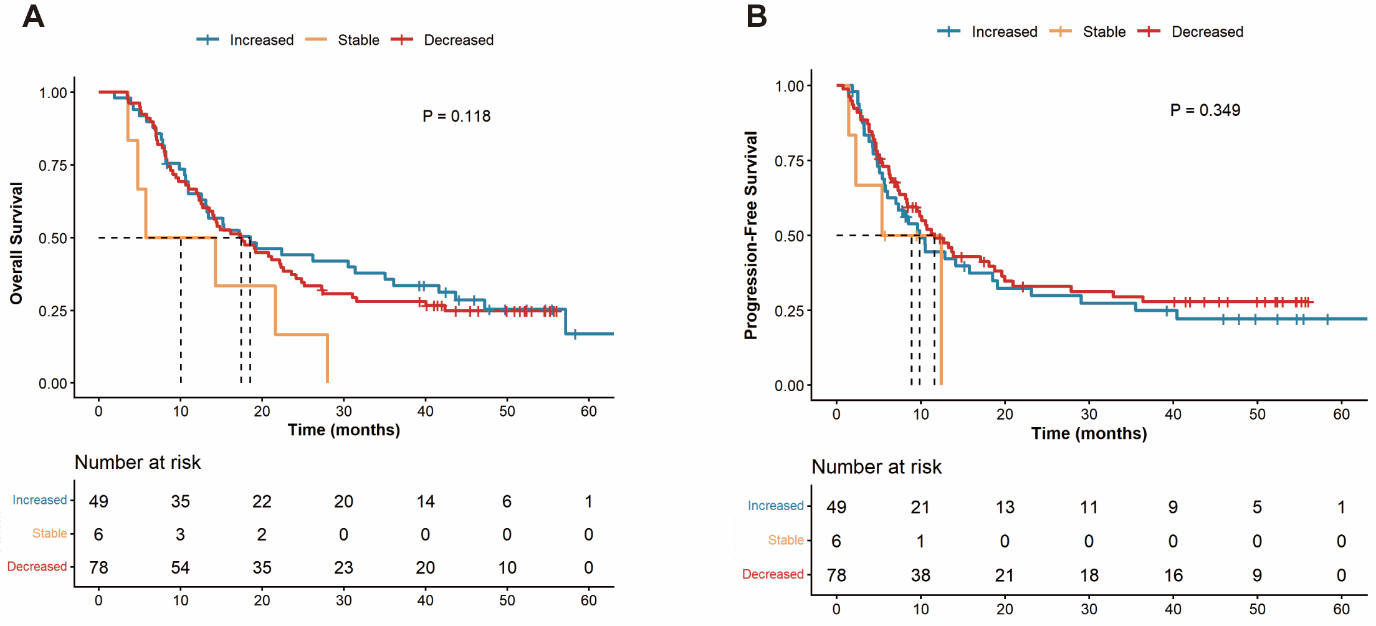


**Supplementary Figure S3.** Kaplan–Meier survival curves stratified by ΔPNI status (decreased, stable, increased). (A) OS; (B) PFS.


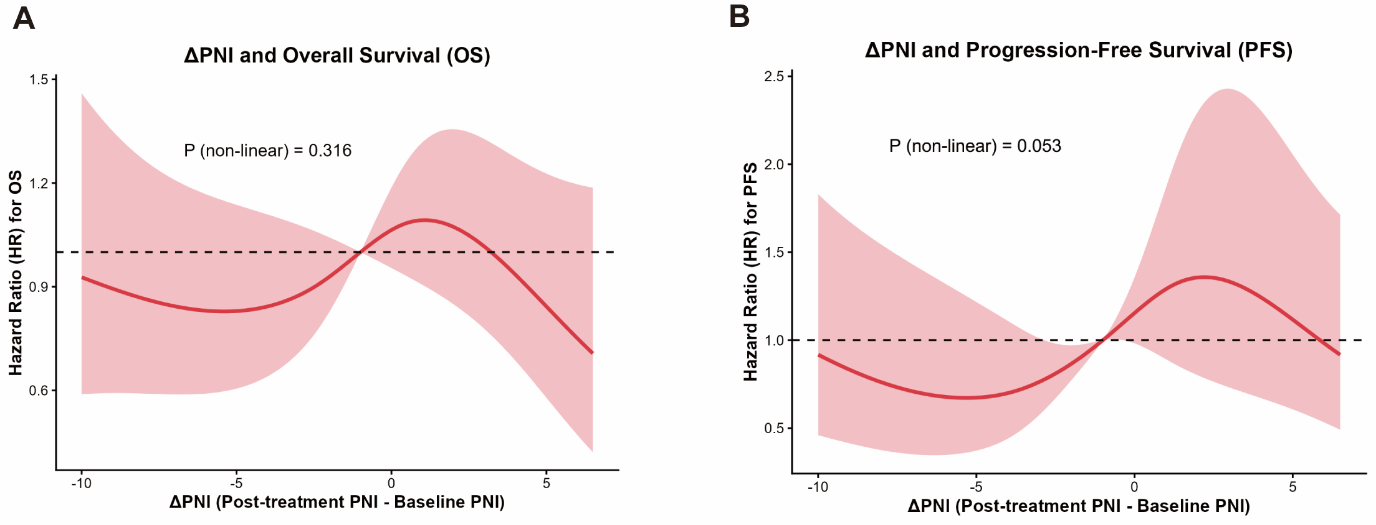


**Supplementary Figure S4.** Restricted cubic spline analysis of ΔPNI and survival. (A) OS (P-nonlinear = 0.316); (B) PFS (P-nonlinear = 0.053). Red line: HR; shaded area: 95% CI; dashed line: HR = 1.

**Supplementary Table S3. Cox regression analysis of ΔPNI categories for overall survival and progression-free survival**

| **Endpoint** | **ΔPNI group** | **HR (95% CI)** | **P value** |
| --- | --- | --- | --- |
| OS | Decreased (ref) | 1 | - |
|  | Stable | 2.24 (0.96–5.22) | 0.061 |
|  | Increased | 0.92 (0.60–1.40) | 0.694 |
| PFS | Decreased (ref) | 1 |  |
|  | Stable | 2.03 (0.73–5.69) | 0.176 |
|  | Increased | 1.15 (0.75–1.78) | 0.517 |
| Note: HRs were calculated with the decreased group as reference. All analyses were adjusted for no covariates due to the exploratory nature of the subgroup. | | | |
